# Supplementary material for: Association between Osteoprotegerin rs2073618 polymorphism and peri-implantitis susceptibility: a meta-analysis
Source: PubMed Central journal article supplement (PMC9743567; doi:10.1186/s12903-022-02657-6), 2022-12-12
Supplement: 12903_2022_2657_MOESM1_ESM.pdf [file 12903_2022_2657_MOESM1_ESM.pdf]

Table S1: Quality assessment and risk of bias of the included studies by NOS.

| Study                     | Assessment items                                                           | Score |
|---------------------------|----------------------------------------------------------------------------|-------|
| Kadkhodazadeh et al. 2012 | Selection                                                                  |       |
|                           | Is the case definition adequate?                                           | ★     |
|                           | Representativeness of the cases                                            | ★     |
|                           | Selection of Controls                                                      |       |
|                           | Definition of Controls                                                     | ★     |
|                           | Comparability                                                              |       |
|                           | Comparability of cases and controls on the basis of the design or analysis | ★     |
|                           | Exposure                                                                   |       |
|                           | Ascertainment of exposure                                                  |       |
|                           | Same method of ascertainment for cases and controls                        | ★     |
|                           | Non-Response rate                                                          | ★     |
|                           | Total                                                                      | 7★    |
| Silva et al. 2020         | Selection                                                                  |       |
|                           | Is the case definition adequate?                                           | ★     |
|                           | Representativeness of the cases                                            | ★     |
|                           | Selection of Controls                                                      |       |
|                           | Definition of Controls                                                     | ★     |
|                           | Comparability                                                              |       |
|                           | Comparability of cases and controls on the basis of the design or analysis | ★★    |
|                           | Exposure                                                                   |       |
|                           | Ascertainment of exposure                                                  | ★     |
|                           | Same method of ascertainment for cases and controls                        | ★     |
|                           | Non-Response rate                                                          | ★     |

|                  |                                                                            |    |
|------------------|----------------------------------------------------------------------------|----|
|                  | Total                                                                      | 8★ |
| Zhou et al. 2016 | Selection                                                                  |    |
|                  | Is the case definition adequate?                                           | ★  |
|                  | Representativeness of the cases                                            | ★  |
|                  | Selection of Controls                                                      |    |
|                  | Definition of Controls                                                     | ★  |
|                  | Comparability                                                              |    |
|                  | Comparability of cases and controls on the basis of the design or analysis | ★  |
|                  | Exposure                                                                   |    |
|                  | Ascertainment of exposure                                                  | ★  |
|                  | Same method of ascertainment for cases and controls                        | ★  |
|                  | Non-Response rate                                                          | ★  |
|                  | Total                                                                      | 7★ |
